# Supplementary material for: Selective IL-1 activity on CD8+ T cells empowers antitumor immunity and synergizes with neovasculature-targeted TNF for full tumor eradication
Source: PubMed Central journal article supplement (PMC8593706; doi:10.1136/jitc-2021-003293), 2021-11-12
Supplement: jitc-2021-003293supp001.pdf [file jitc-2021-003293supp001.pdf]

## Supplementary Materials for

### **Selective IL-1 activity on CD8<sup>+</sup> T cells empowers antitumor immunity and synergizes with neovasculature-targeted TNF for full tumor eradication**

Bram Van Den Eeckhout, Leander Huyghe, Sandra Van Lint, Elianne Burg, Stéphane Plaisance, Frank Peelman, Anje Cauwels, Gilles Uzé, Niko Kley, Sarah Gerlo\* and Jan Tavernier\*

\*Corresponding authors. Email: sarah.gerlo@ugent.be and jan.tavernier@vib-ugent.be

#### **These Supplementary Materials include:**

- Supplementary Figures and Table Legends
- Supplementary Figures 1 – 16
- Supplementary Table 1 – 2
- Supplementary Methods
- Supplementary References

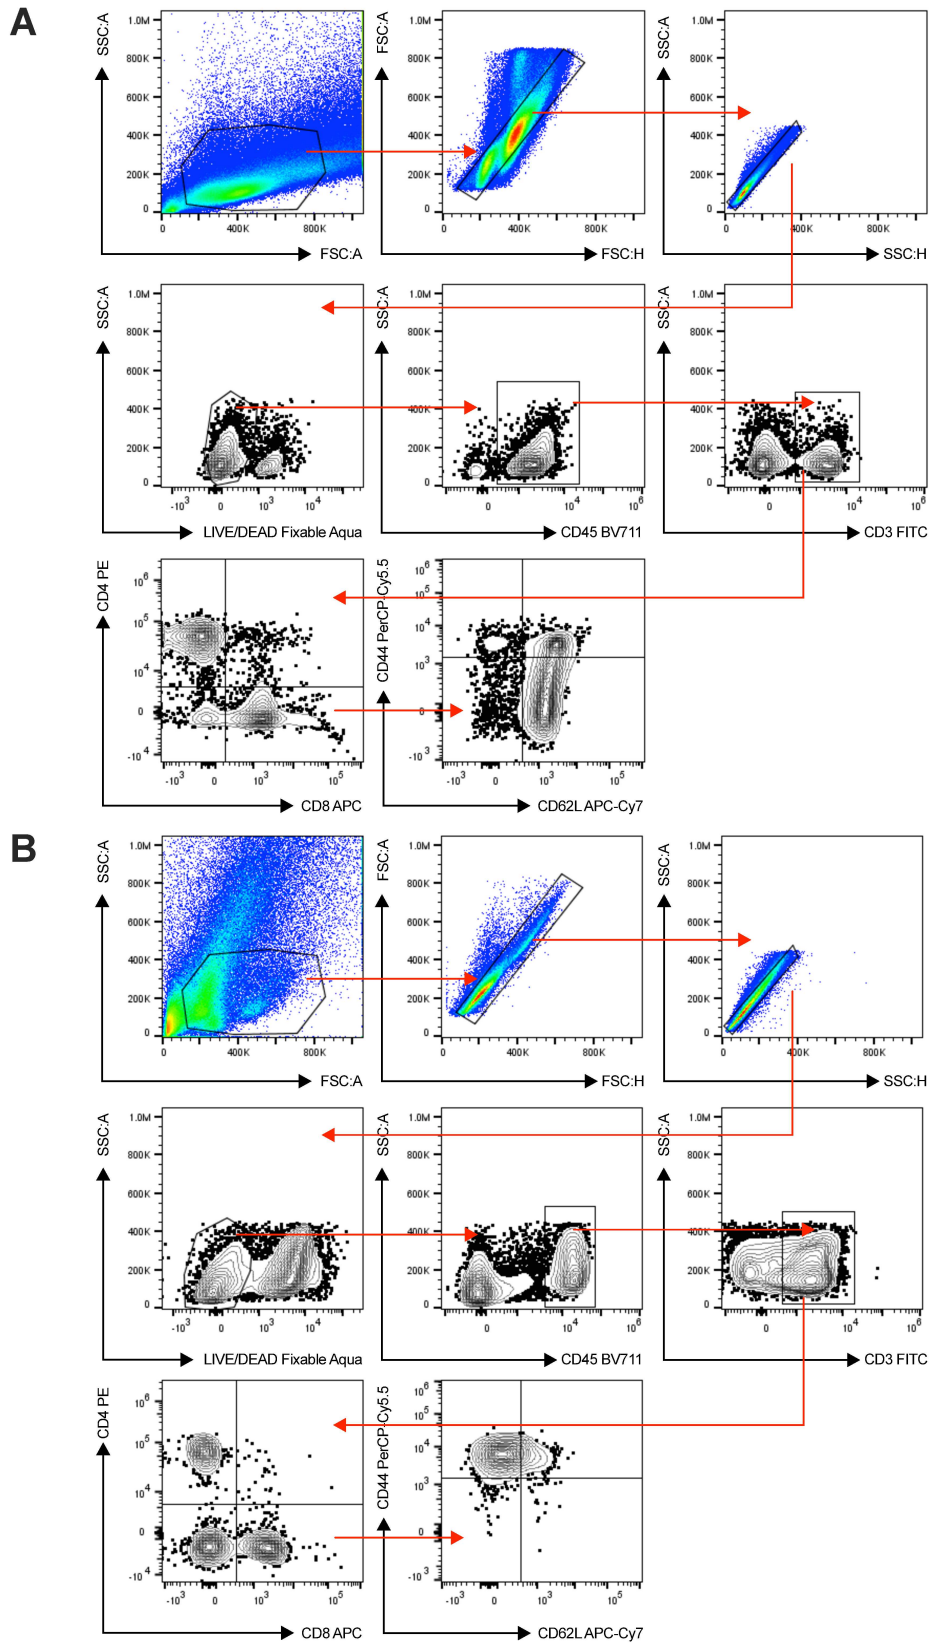

**Supplementary Figure 1.** Gating strategy for the detection of naive and effector CD8<sup>+</sup> T cells in the TDLN (A) and tumor tissue (B) of LLC-OVA tumor-bearing mice via flow cytometry. Staining with LIVE/DEAD Fixable Aqua cell viability dye, CD45 BV711, CD3 FITC, CD4 PE, CD8 APC, CD44 PerCP-Cy5.5 and CD62L APC-Cy7. In the living (LIVE/DEAD<sup>-</sup>) subset of single cells (based on FSC/SSC), we detected naive CD8<sup>+</sup> T cells as CD45<sup>+</sup>CD3<sup>+</sup>CD4<sup>-</sup>CD8<sup>+</sup>CD44<sup>-</sup>CD62L<sup>+</sup> cells and effector CD8<sup>+</sup> T cells as CD45<sup>+</sup>CD3<sup>+</sup>CD4<sup>-</sup>CD8<sup>+</sup>CD44<sup>+</sup>CD62L<sup>-</sup> cells.

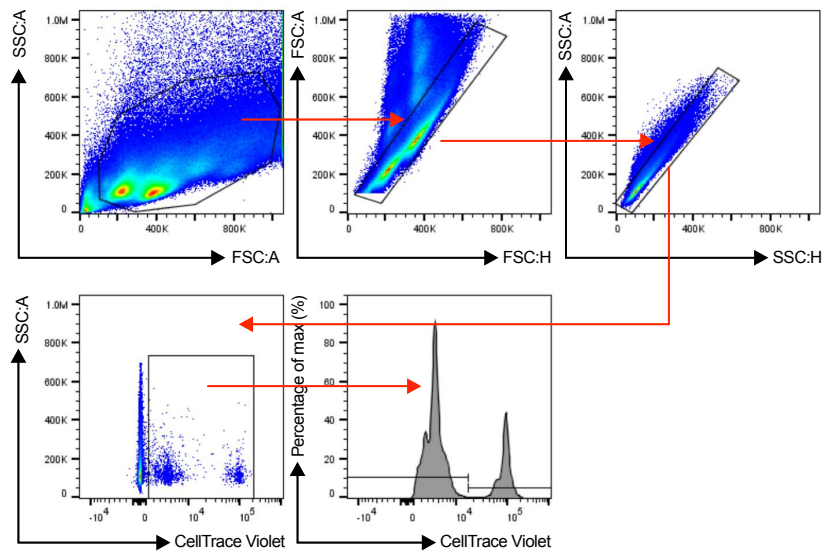

**Supplementary Figure 2.** Gating strategy for the detection of adoptively transferred target cells in the spleens of acceptor mice. Prior to transfer, cells were labeled with CTV in a high or low concentration and loaded with SIINFEKL (CTV<sup>high</sup>) or left unloaded (CTV<sup>low</sup>).

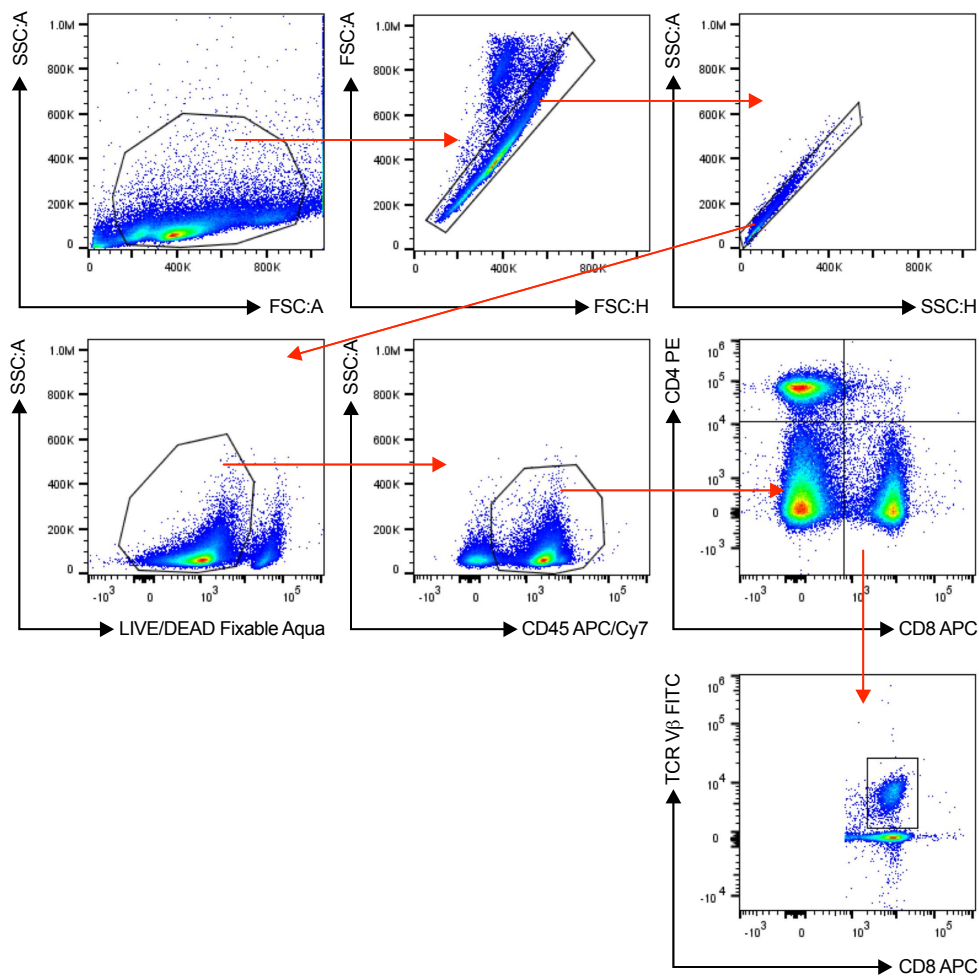

**Supplementary Figure 3.** Gating strategy for the detection of different TCR V $\beta$  clonotypes in the TDLN of LLC-OVA tumor-bearing mice via flow cytometry. Staining with LIVE/DEAD Fixable Aqua cell viability dye, CD45 APC-Cy7, CD4 PE, CD8 APC and different TCR V $\beta$  FITC antibodies. Clonotype frequencies were measured in the CD45<sup>+</sup>CD4<sup>-</sup>CD8<sup>+</sup> and CD45<sup>+</sup>CD4<sup>+</sup>CD8<sup>-</sup> subsets of living (LIVE/DEAD<sup>-</sup>) single cells (based on FSC/SSC).

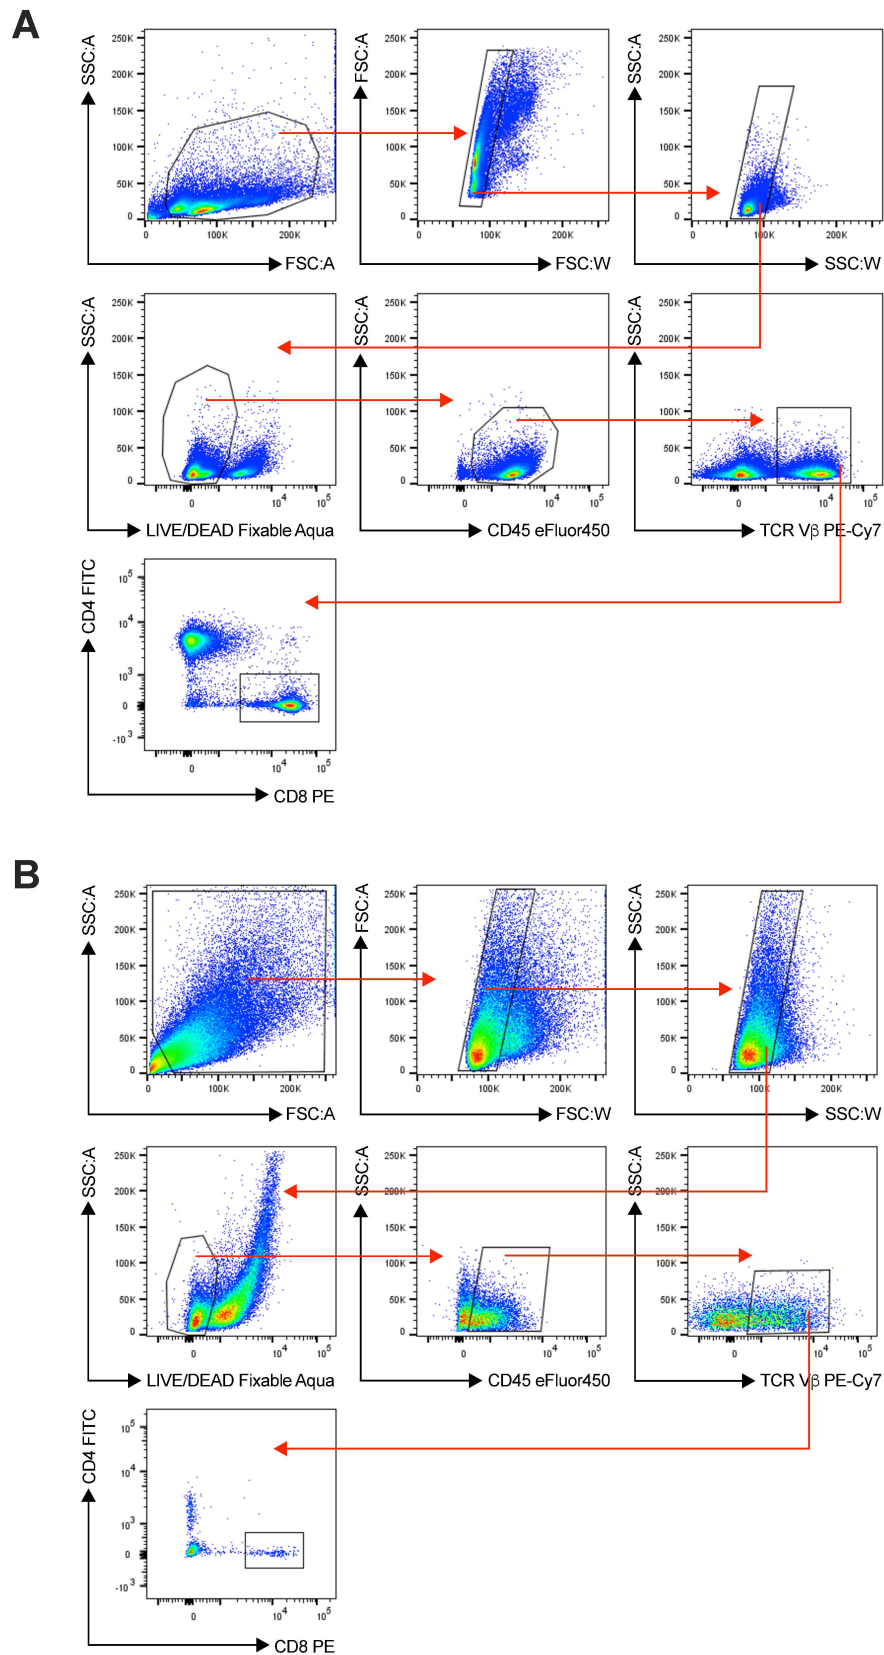

**Supplementary Figure 4.** Gating strategy for the sort of CD8<sup>+</sup> T cells from the TDLN (**A**) and tumor tissues (**B**) of LLC-OVA tumor-bearing mice. Staining with LIVE/DEAD Fixable Aqua cell viability dye, CD45 eFluor450, TCR V $\beta$  PE-Cy7, CD4 FITC and CD8 PE. In the living (LIVE/DEAD<sup>-</sup>) subset of single cells (based on FSC/SSC), we detected CD8<sup>+</sup> T cells as CD45<sup>+</sup>TCR V $\beta$ <sup>+</sup>CD4<sup>-</sup>CD8<sup>+</sup> cells.

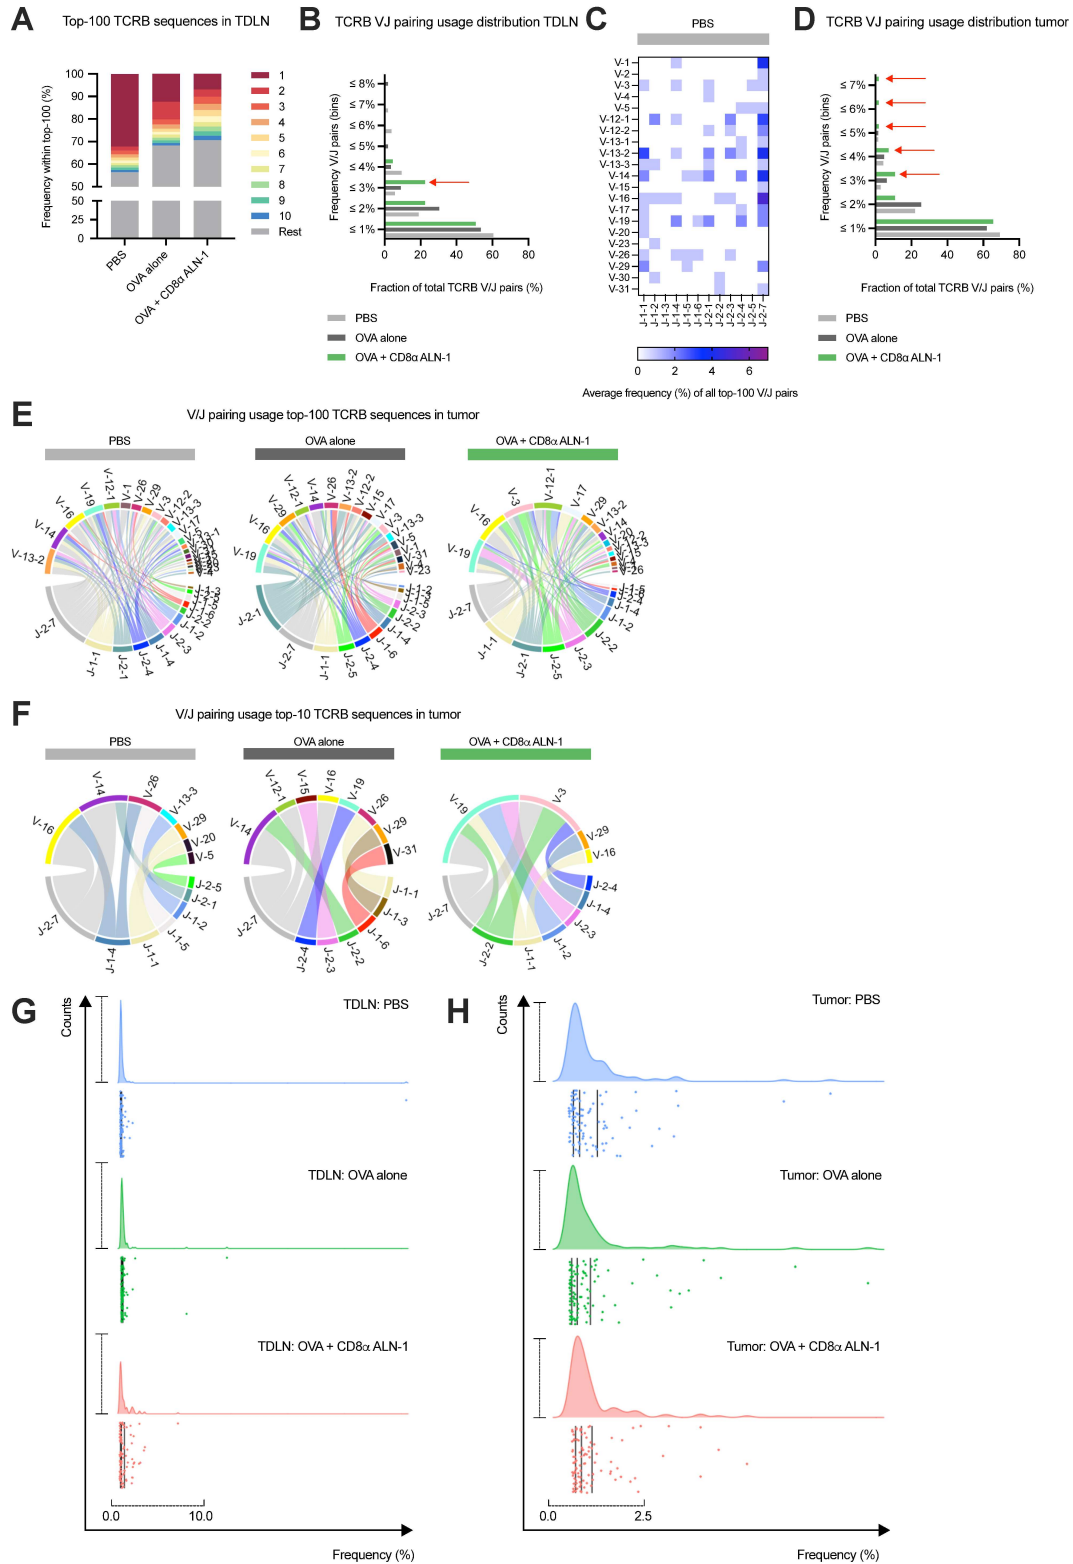

**Supplementary Figure 5.** (A) Frequency of the top-10 most abundant TCRB sequences (stacked bars in color) within the top-100 most abundant TDLN TCRB sequences. The same color does not necessarily represent the same clonotype in the different bars. Data from individual mice were pooled per group. (B) and (D) Frequency distribution of V/J pairing usage of the top-100 most abundant TCRB sequences in the TDLN (B) and tumor (D). (C) V/J pairing usage within the top-100 most abundant TDLN TCRB sequences for mice treated with PBS. (E) and (F) V/J pairing usage within the top-100 (E) and top-10 (F) most abundant tumor TCRB sequences. (G) and (H) Frequency distribution of the top-100 most abundant TCRB sequences in TDLN (G) and tumor (H). Histograms (*top*) give an overview of the frequency distribution per group with dotted lines indicating the scale for both axes. Points (*bottom*) represent the individual clones that comprise the top-100 TCRB sequences. Black vertical lines represent Q1, Q2 (= median) and Q3.



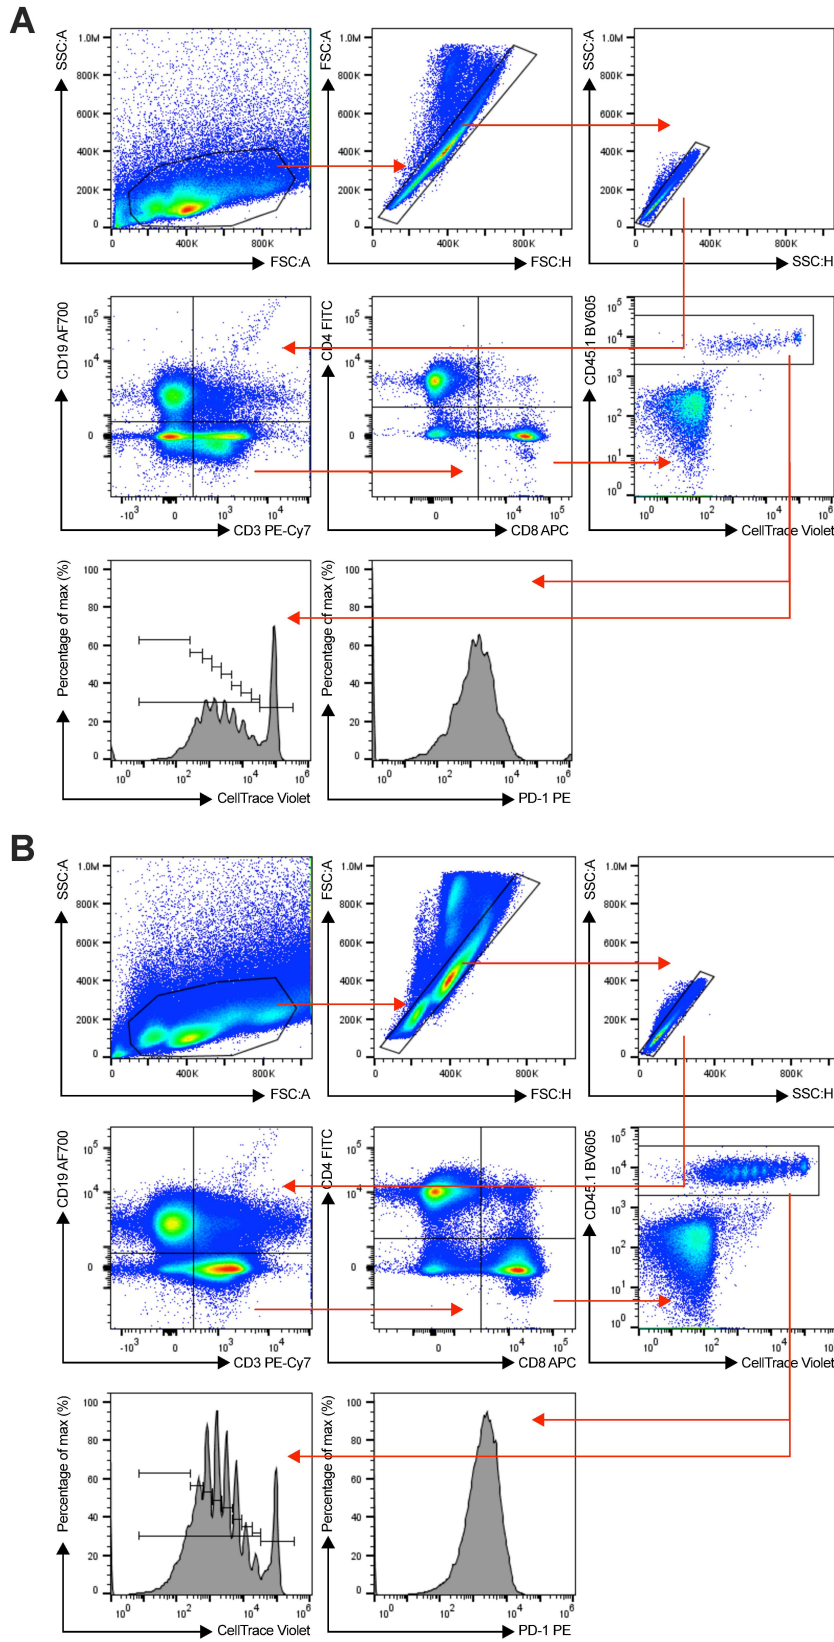

**Supplementary Figure 6.** Gating strategy for the detection of OT-I CD8<sup>+</sup> T cell proliferation and PD-1 upregulation in the TDLNs of B16- (A) and LLC-OVA (B) tumor-bearing mice via flow cytometry. Staining with CD19 AF700, CD3 PE-Cy7, CD4 FITC, CD8 APC and CD45.1 BV605. OT-I CD8<sup>+</sup> T cells were detected as CD19<sup>-</sup>CD3<sup>+</sup>CD4<sup>-</sup>CD8<sup>+</sup>CD45.1<sup>+</sup>CTV<sup>labeled</sup> cells within the single cell population (based on FSC/SSC).

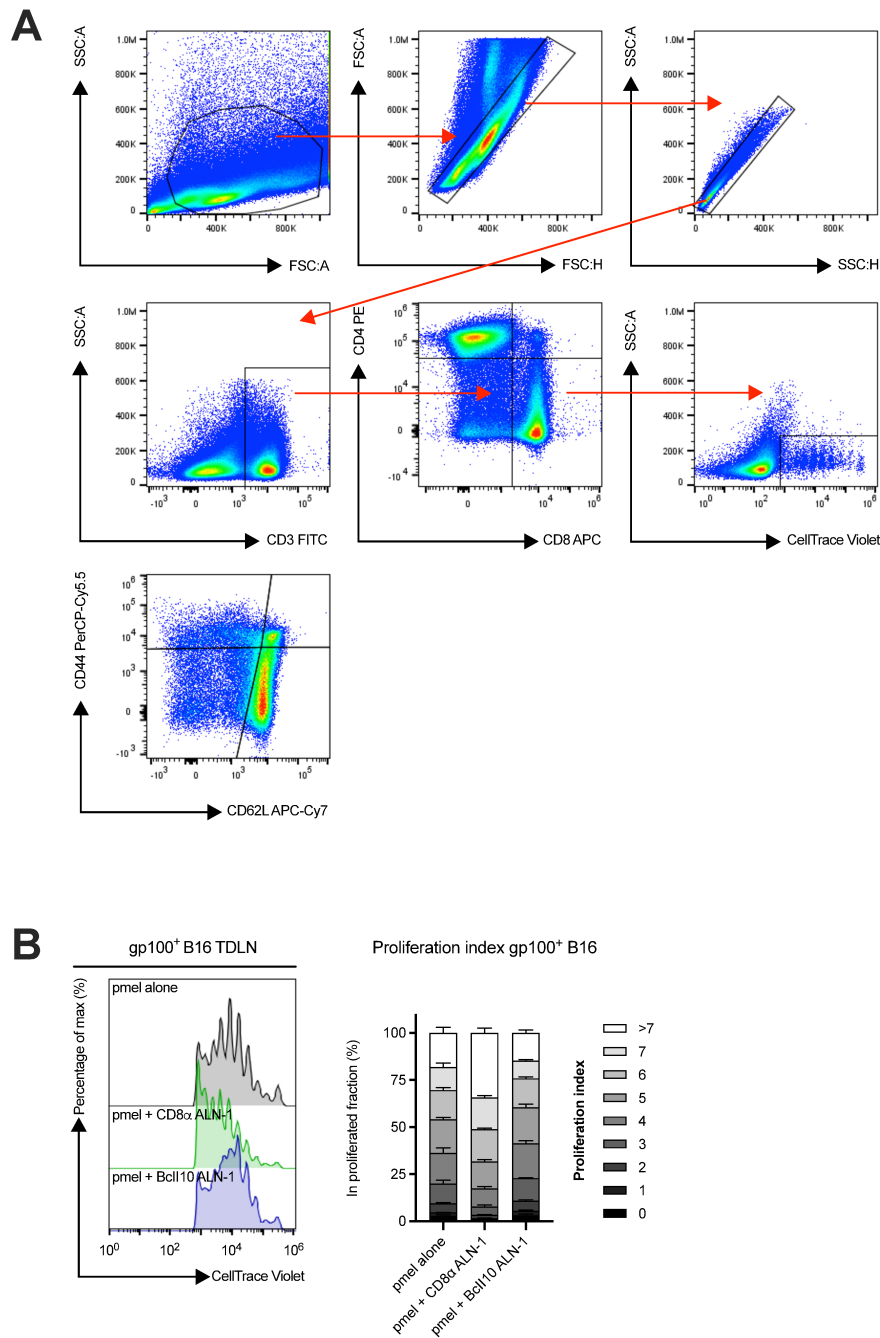

**Supplementary Figure 7.** (A) Gating strategy for the detection of pmel CD8<sup>+</sup> T cell proliferation in the TDLNs of B16 gp100<sup>+</sup> tumor-bearing mice via flow cytometry. Staining with CD3 FITC, CD4 PE and CD8 APC. pmel CD8<sup>+</sup> T cells were detected as CD3<sup>+</sup>CD4<sup>-</sup>CD8<sup>+</sup>CTV<sup>labeled</sup> cells within the single cell population (based on FSC/SSC). (B) Stacked

histograms summarizing the proliferation index of pmel CD8<sup>+</sup> T cell proliferation in B16 gp100<sup>+</sup> tumor-bearing mice. Individual stacks represent the mean percentages of proliferating pmel CD8<sup>+</sup> T cells in certain stages of cell division  $\pm$  s.e.m. of an experiment with  $n = 6$  mice/group. Representative flow cytometry histograms display pmel CD8<sup>+</sup> T cell proliferation.

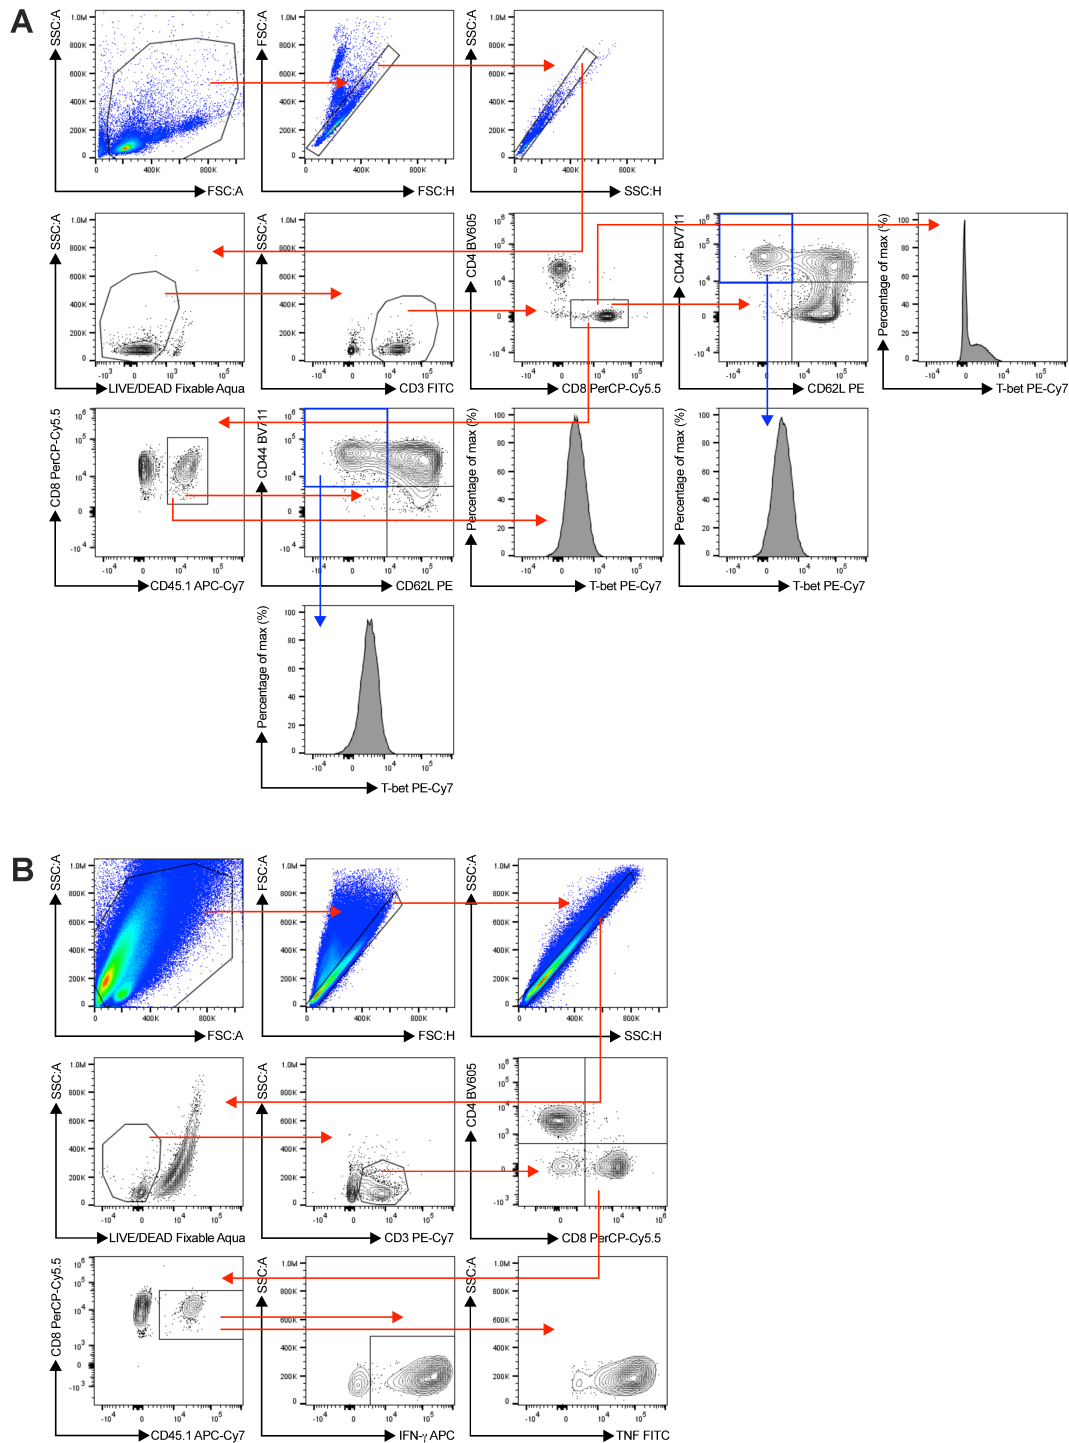

**Supplementary Figure 8. (A)** Gating strategy for the detection of naive and effector (OT-I)  $CD8^+$  T cells in the TDLN and tumor tissue of LLC-OVA tumor-bearing mice. Staining with

LIVE/DEAD Fixable Aqua cell viability dye, CD3 FITC, CD4 BV605, CD8 PerCP-Cy5.5, CD45.1 APC-Cy7, CD44 BV711, CD62L PE and T-bet PE-Cy7. Naive and effector (OT-I) CD8<sup>+</sup> T cells were identified within the living (LIVE/DEAD<sup>-</sup>) single cell (based on FSC/SSC) population as CD3<sup>+</sup>CD4<sup>-</sup>CD8<sup>+</sup>(CD45.1<sup>+</sup>)CD44<sup>-</sup>CD62L<sup>+</sup> cells and CD3<sup>+</sup>CD4<sup>-</sup>CD8<sup>+</sup>(CD45.1<sup>+</sup>)CD44<sup>+</sup>CD62L<sup>-</sup> cells, respectively. **(B)** Gating strategy for the detection of cytokine release following *ex vivo* restimulation of murine splenocytes with SIINFEKL peptide. Staining with LIVE/DEAD Fixable Aqua cell viability dye, CD3 PE-Cy7, CD4 BV605, CD8 PerCP-Cy5.5, CD45.1 APC-Cy7, IFN- $\gamma$  APC and TNF FITC. We detected IFN- $\gamma$  and TNF release in the CD3<sup>+</sup>CD4<sup>-</sup>CD8<sup>+</sup>(CD45.1<sup>+</sup>) cells within the population of living (LIVE/DEAD<sup>-</sup>) single cells (based on FSC/SSC).

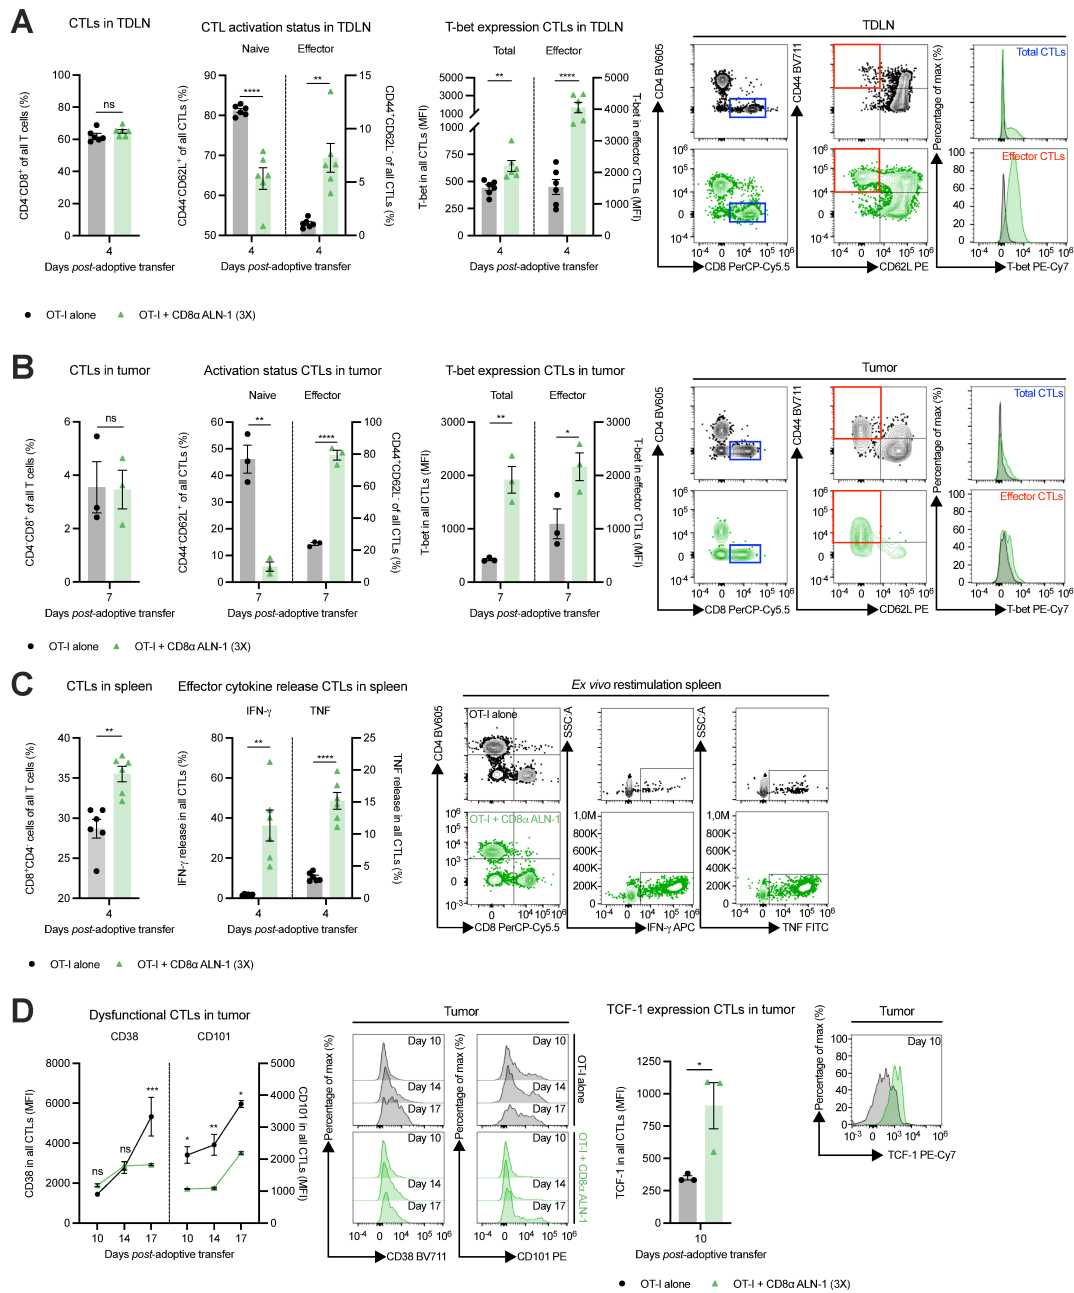

**Supplementary Figure 9. (A) and (B)** Frequencies of CD8<sup>+</sup> T cells within the total T cell population, naive (CD44<sup>+</sup>CD62L<sup>+</sup>) and effector (CD44<sup>+</sup>CD62L<sup>-</sup>) phenotypes within the total CD8<sup>+</sup> T cell population and T-bet expression within the total and effector CD8<sup>+</sup> T cell population in TDLN (A) and tumor tissue (B) with representative flow cytometry dot plots. (C) Frequencies of CD8<sup>+</sup> T cells within the total T cell population and release of IFN- $\gamma$  and

TNF by CD8<sup>+</sup> T cells following *ex vivo* restimulation of splenocytes with SIINFEKL peptide with representative flow cytometry dot plots. **(D)** Expression of CD101, CD38 and TCF-1 on CD8<sup>+</sup> T cells in tumor with representative flow cytometry histograms. Bars and data points represent the mean  $\pm$  s.e.m. of an experiment with  $n = 6$  mice/group (for TDLN and spleen samples) or  $n = 3$  mice/group (for tumor samples, as two mice were pooled together). \*\*\*\*,  $p < 0.0001$ ; \*\*\*,  $p < 0.001$ ; \*\*,  $p < 0.01$ ; \*,  $p < 0.05$ ; ns,  $p \geq 0.05$  by unpaired Student's *t*-test (**A** – **D**) or two-way ANOVA with Sidak's multiple comparison's test (**D**).

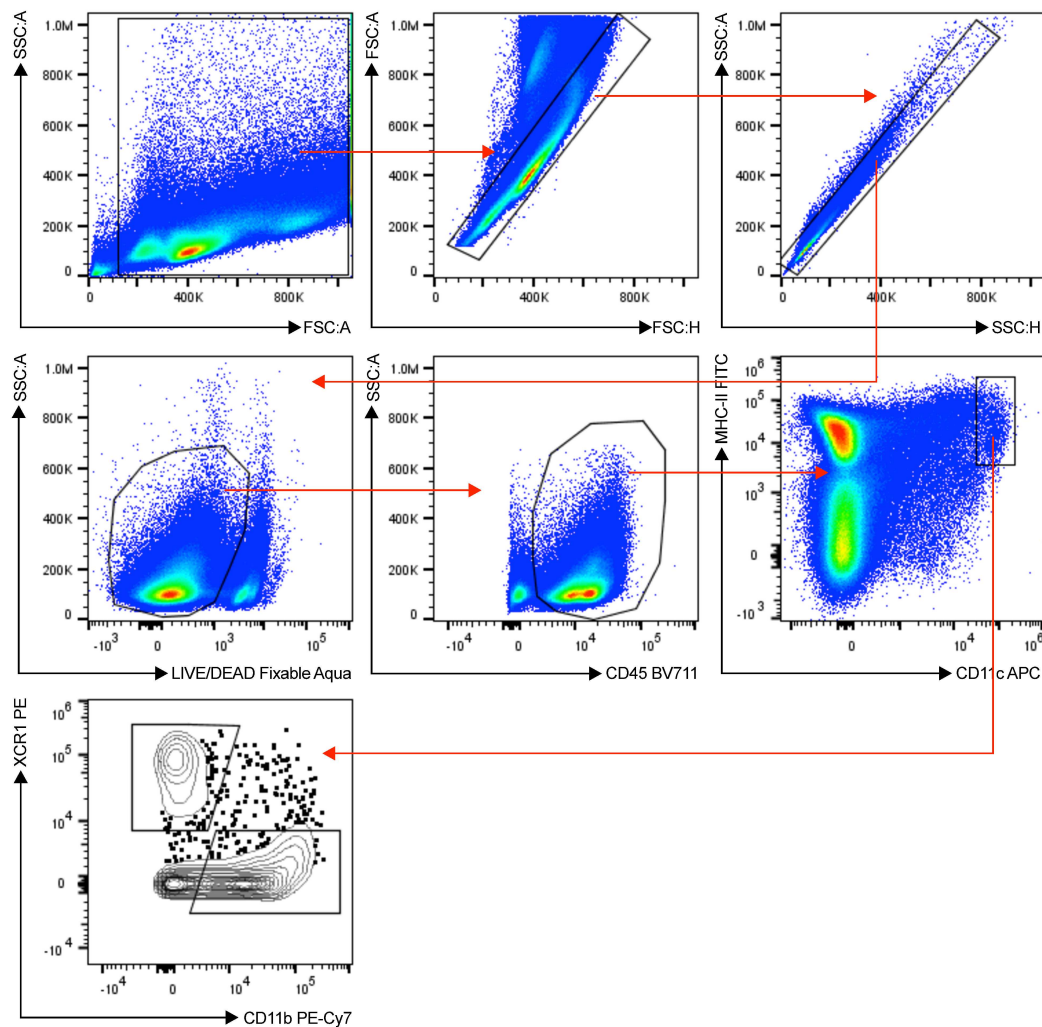



**Supplementary Figure 10.** Gating strategy for the detection of cDC1s and cDC2 in the TDLNs of LLC-OVA tumor-bearing mice via flow cytometry. Staining with LIVE/DEAD Fixable Aqua cell viability dye, CD45 BV711, MHC-II FITC, CD11c APC, XCR1 PE and CD11b PE-Cy7. Within the subset of living (LIVE/DEAD<sup>-</sup>) single cells (based on FSC/SSC), we detected cDC1s as CD45<sup>+</sup>MHC-II<sup>+</sup>CD11c<sup>+</sup>XCR1<sup>+</sup>CD11b<sup>-</sup> cells and cDC2 as CD45<sup>+</sup>MHC-II<sup>+</sup>CD11c<sup>+</sup>XCR1<sup>-</sup>CD11b<sup>+</sup> cells.

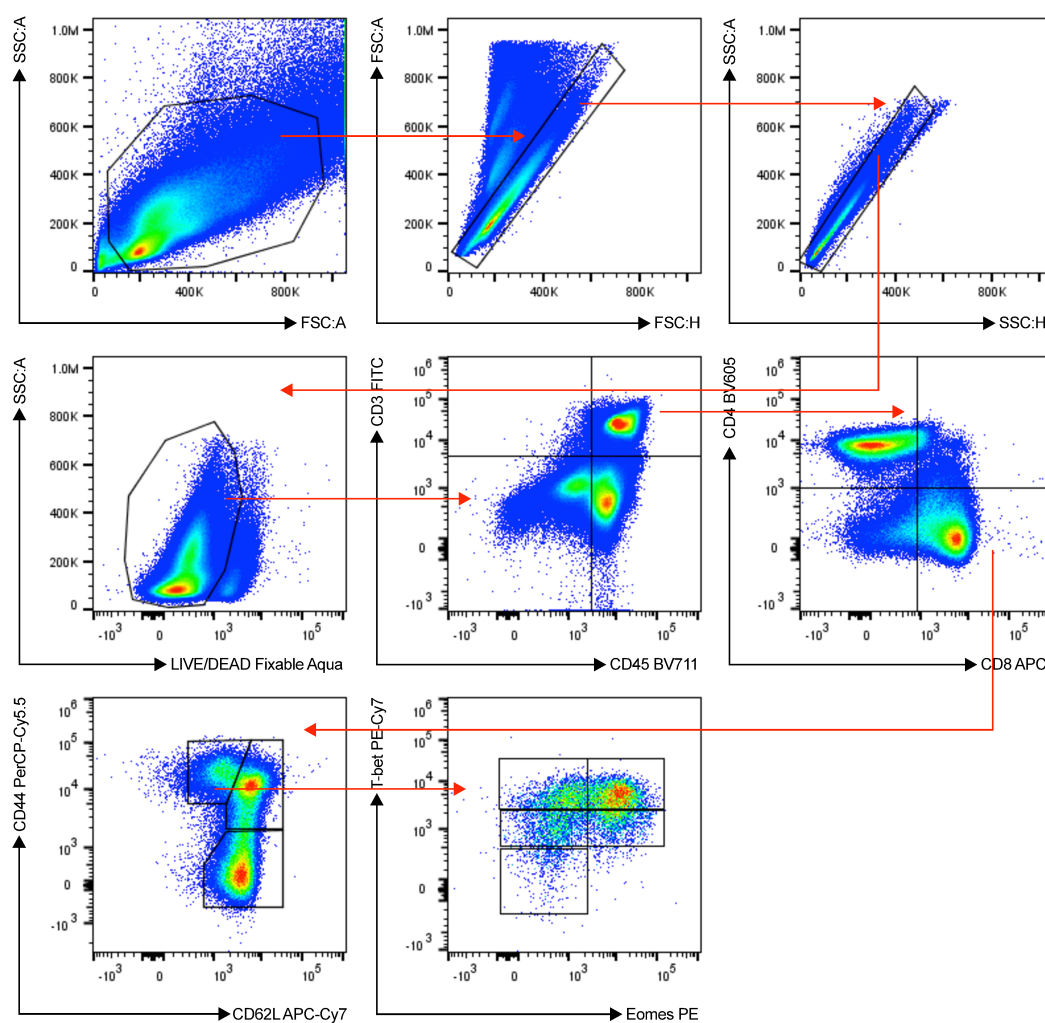

**Supplementary Figure 11.** Gating strategy for the detection of naive and effector CD8<sup>+</sup> T cells in the TDLNs of WT or full-body Batf3<sup>-/-</sup> C57BL/6 mice. Staining with LIVE/DEAD

Fixable Aqua cell viability dye, CD3 FITC, CD45 BV711, CD4 BV605, CD8 APC, CD44 PerCP-Cy5.5, CD62L APC-Cy7, T-bet PE-Cy7 and Eomes PE. In the living (LIVE/DEAD<sup>-</sup>) subset of single cells (based on FSC/SSC), we detected naive CD8<sup>+</sup> T cells as CD45<sup>+</sup>CD3<sup>+</sup>CD4<sup>-</sup>CD8<sup>+</sup>CD44<sup>-</sup>CD62L<sup>+</sup> cells and effector CD8<sup>+</sup> T cells as CD45<sup>+</sup>CD3<sup>+</sup>CD4<sup>-</sup>CD8<sup>+</sup>CD44<sup>+</sup>CD62L<sup>-</sup> cells.

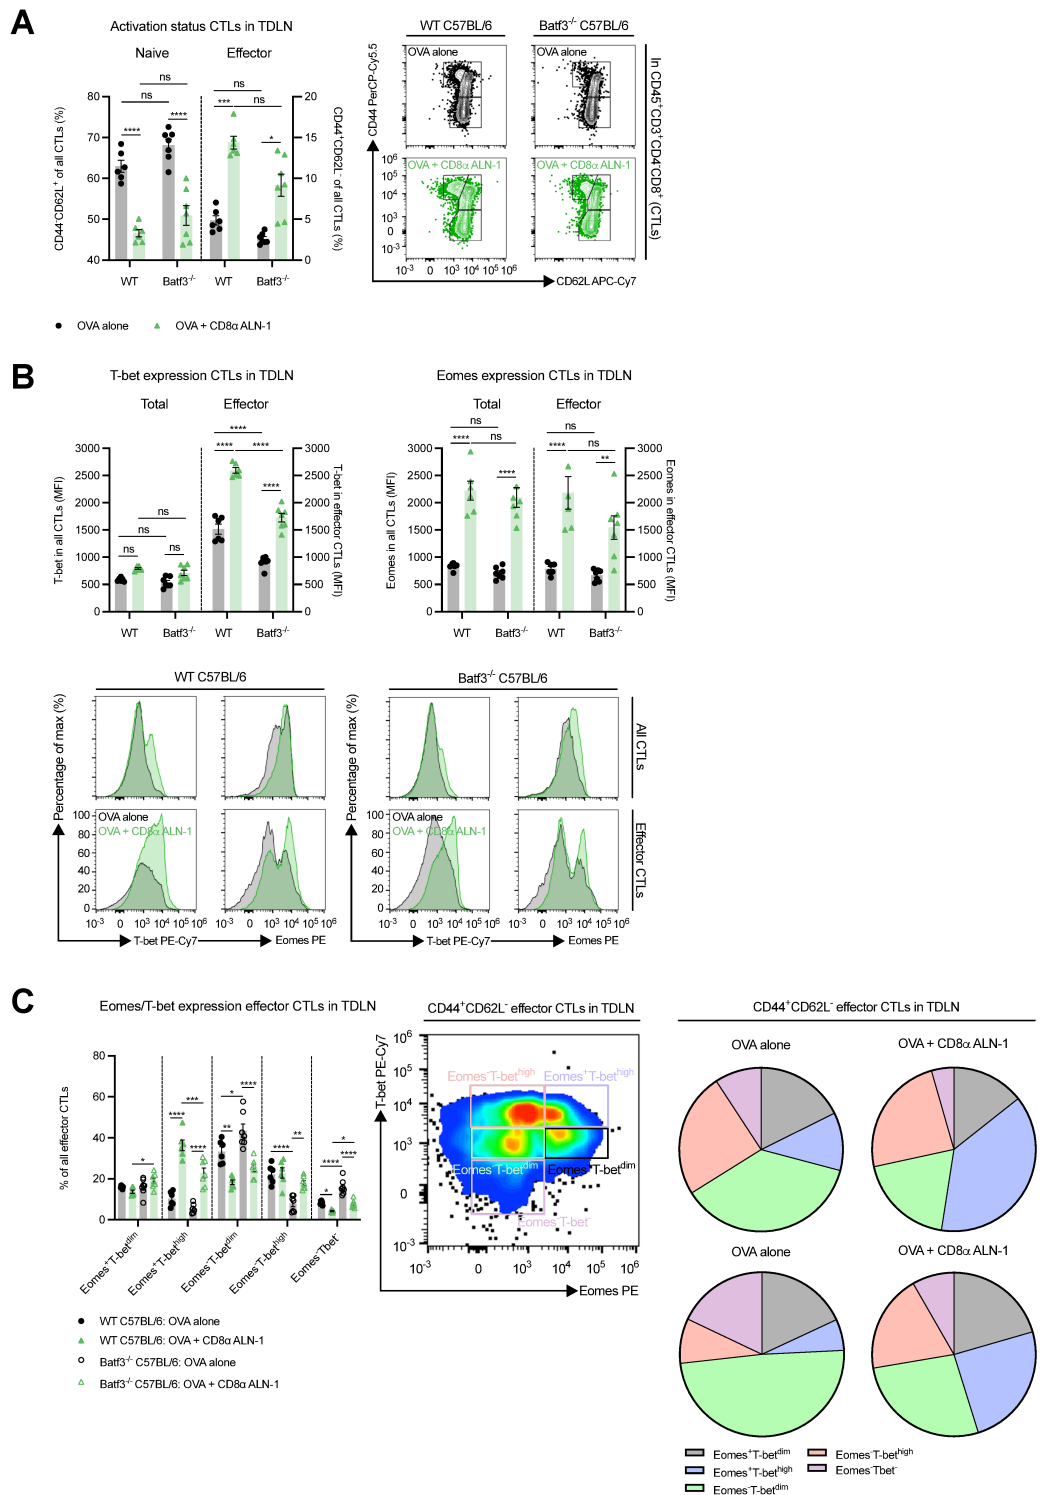

**Supplementary Figure 12.** (A) Relative amounts of naive (CD44<sup>+</sup>CD62L<sup>+</sup>) and effector (CD44<sup>+</sup>CD62L<sup>-</sup>) CD8<sup>+</sup> T cells within the total CTL population in TDLNs of WT or full-body

Batf3<sup>-/-</sup> LLC-OVA tumor-bearing mice (*left*) with representative flow cytometry dot plots (*right*). **(B)** Expression (MFI) of T-bet and Eomes in the total or effector CD8<sup>+</sup> T cell population in TDLNs of WT or full-body Batf3<sup>-/-</sup> LLC-OVA tumor-bearing mice (*top*) with representative flow cytometry histograms (*bottom*). **(C)** Relative amounts of different T-bet/Eomes-expressing effector CD8<sup>+</sup> T cell populations within TDLNs of WT or full-body Batf3<sup>-/-</sup> LLC-OVA tumor-bearing mice (*left*) according to the gating strategy displayed in the representative flow cytometry dot plot (*middle*). Fractions of the different T-bet/Eomes-expressing effector CD8<sup>+</sup> T cell population represented as parts-of-whole (*right*). Bars represent the mean  $\pm$  s.e.m. of an experiment with  $n = 6$  mice/group. \*\*\*\*,  $p < 0.0001$ ; \*\*\*,  $p < 0.001$ ; \*\*,  $p < 0.01$ ; \*,  $p < 0.05$ ; ns,  $p \geq 0.05$  by one-way ANOVA with Tukey's multiple comparisons test.

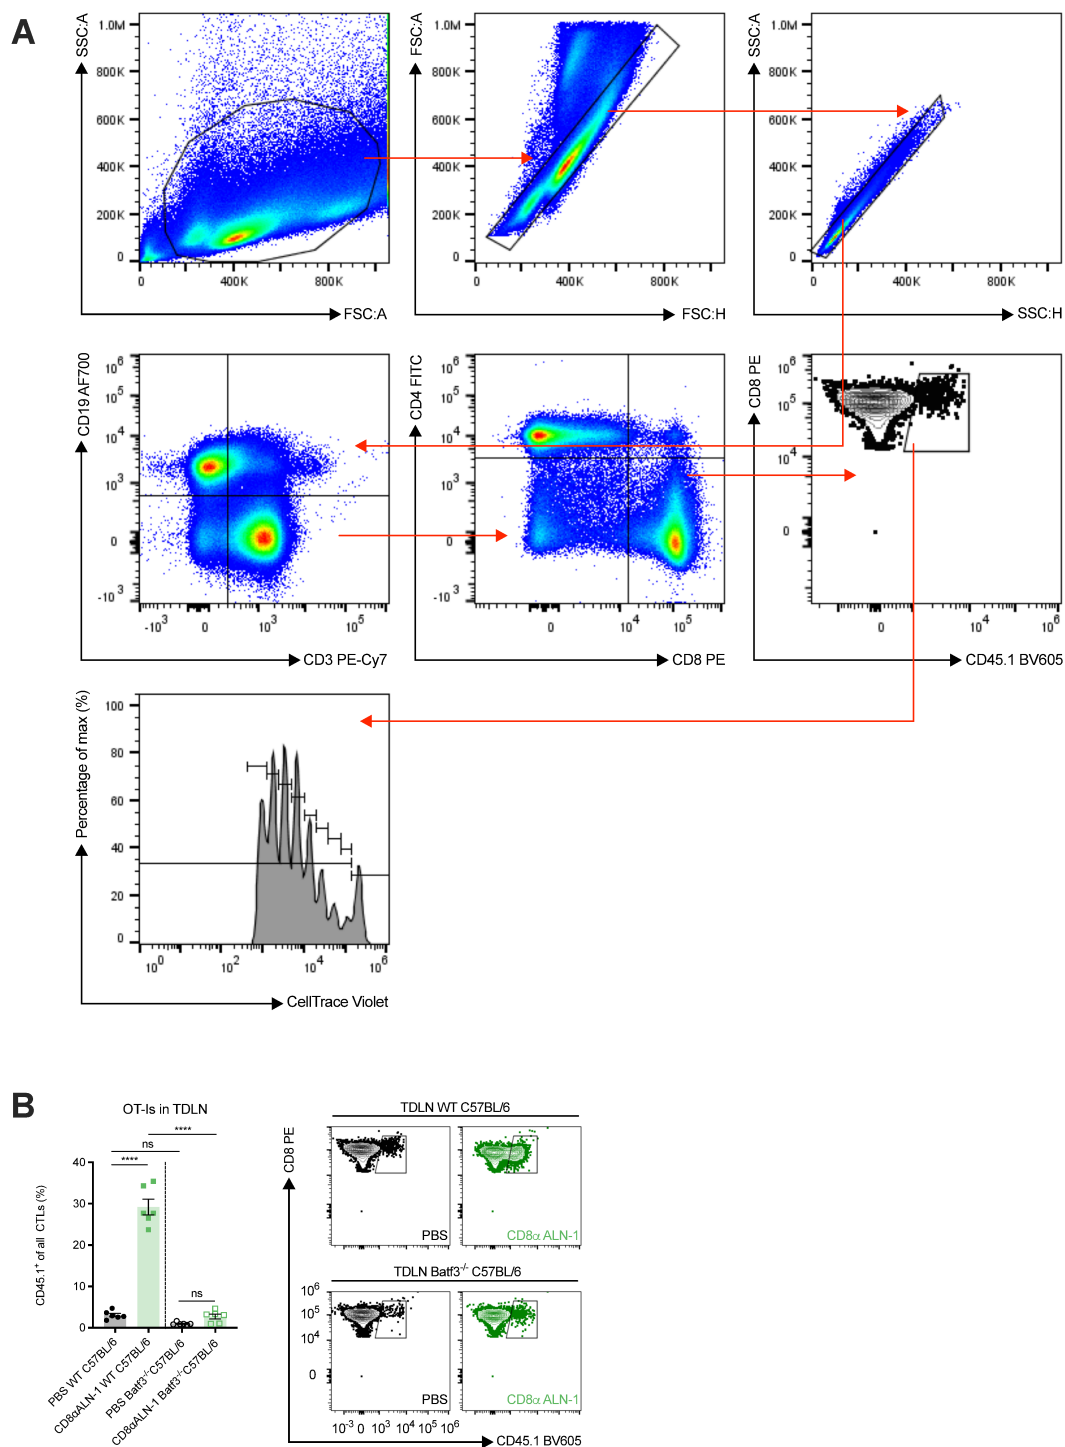

**Supplementary Figure 13. (A)** Gating strategy for the detection of OT-I CD8<sup>+</sup> T cell proliferation in the TDLNs of WT or full-body Batf3<sup>-/-</sup> C57BL/6 mice. Staining with CD19

AF700, CD3 PE-Cy7, CD4 FITC, CD8 PE and CD45.1 BV605. OT-I CD8<sup>+</sup> T cells were detected as CD19<sup>-</sup>CD3<sup>+</sup>CD4<sup>-</sup>CD8<sup>+</sup>CD45.1<sup>+</sup> cells within the single cell population (based on FSC/SSC) and proliferation was measured as CTV dilution. **(B)** Relative amounts of OT-I CD8<sup>+</sup> T cells within the total CD8<sup>+</sup> T cell population in TDLNs of WT and full-body *Batf3*<sup>-/-</sup> LLC-OVA tumor-bearing acceptor mice (*left*) with representative flow cytometry dot plots (*right*). Bars represent the mean  $\pm$  s.e.m. of an experiment with  $n = 6$  mice/group. \*\*\*\*,  $p < 0.0001$ ; ns,  $p \geq 0.05$  by one-way ANOVA with Tukey's multiple comparisons test.

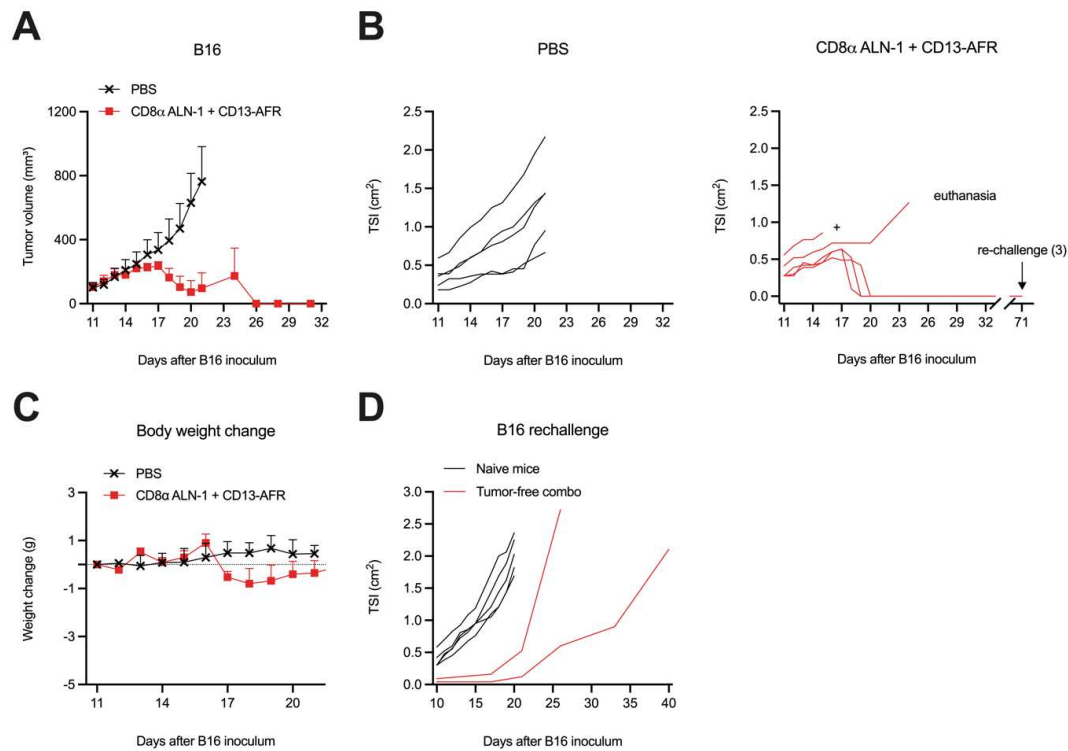

**Supplementary Figure 14.** Mice were inoculated with B16 ( $0.6 \times 10^6$  cells) and treatment was initiated after 10 days of s.c. tumor growth. From D10 – D13, mice received an i.p. treatment with CD8 $\alpha$  ALN-1 (10  $\mu$ g) combined with additional i.p. treatments with CD13 AFR (50  $\mu$ g) from D14 – D16. Control mice received i.p. treatments with PBS from D10 – D16. **(A)** B16 tumor growth over time. Data points represent the mean  $\pm$  s.e.m. of one experiment with  $n = 5$

mice/group. **(B)** B16 tumor growth over time for the individual treatment conditions. Individual mice are shown. **(C)** Change in body weight over time. Data points represent the mean  $\pm$  s.e.m. of one experiment with  $n = 5$  mice/group. **(D)** B16 tumor growth over time after s.c. rechallenge of mice previously treated with CD8 $\alpha$  ALN-1 + CD13 AFR. Naive mice were used as control animals in this experiment. Individual mice are shown.

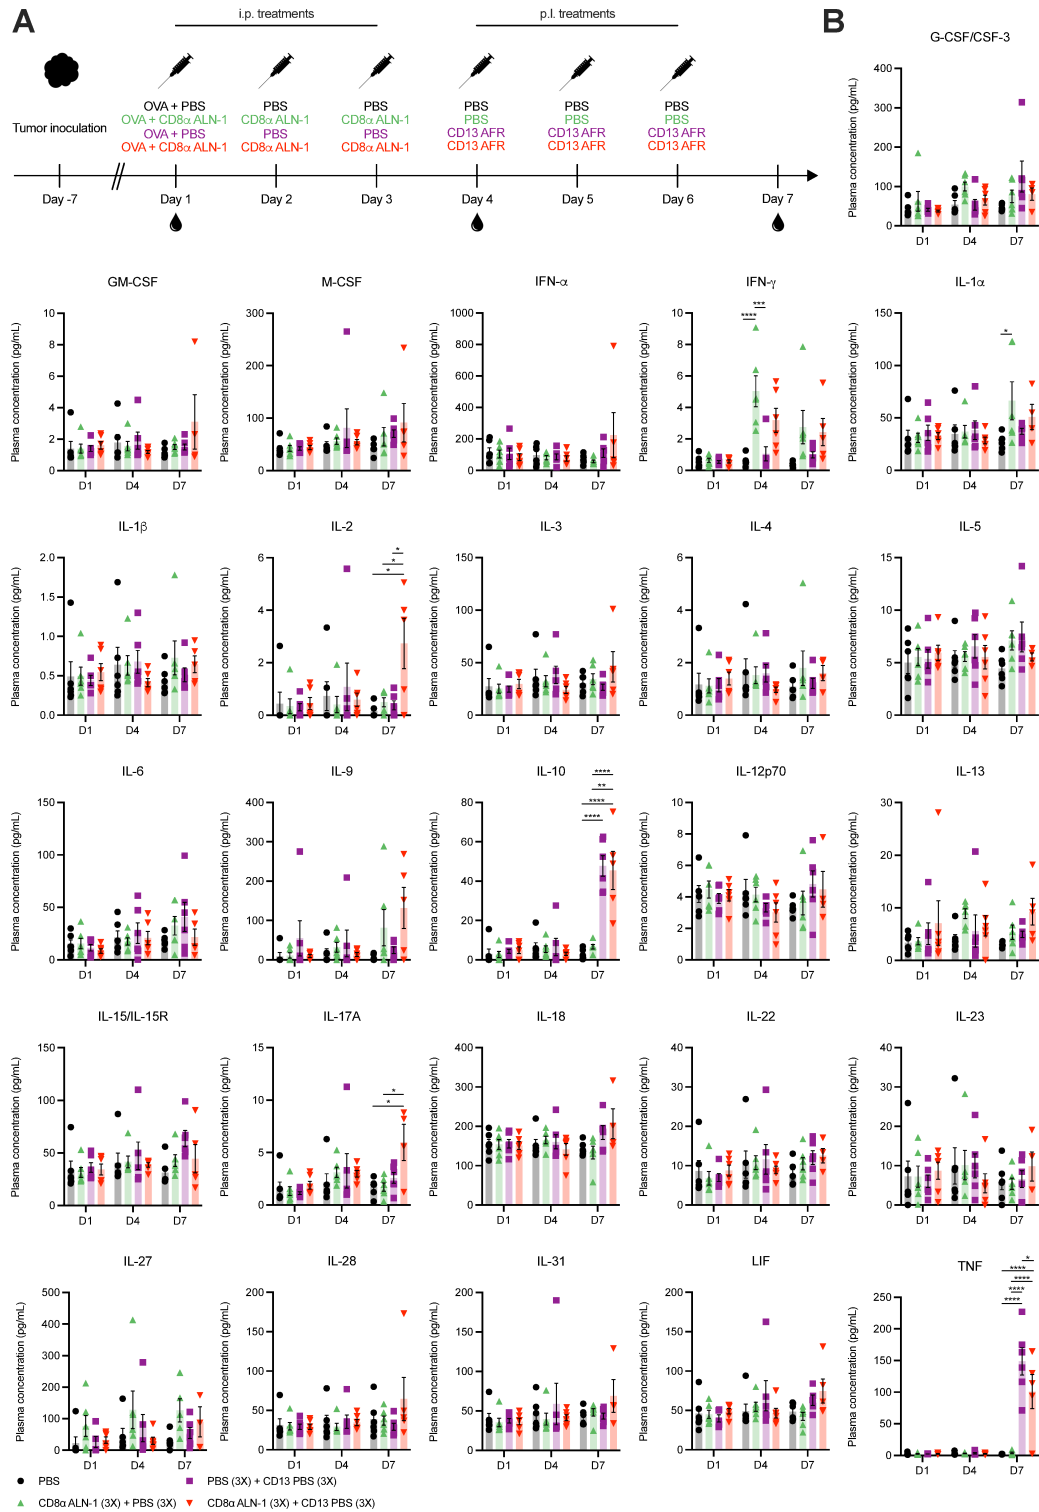



**Supplementary Figure 15.** (A) Schematic representation of the experiment. LLC-OVA tumors were grown s.c. for seven days, after which mice received i.p. treatments with OVA (100 µg) in combination with PBS or CD8α ALN-1 (10 µg) every 24h for three consecutive days, followed by p.i. treatments with PBS or CD13 AFR (50 µg) every 24h for three consecutive days. Tail vein blood was sampled at the start of treatment (day 1), the fourth day of treatment (day 4) or one day after the last treatment (day 7). (B) Plasma cytokine concentrations following different treatments over time. Bars represents the mean ± s.e.m. of an experiment with  $n = 6$  mice/group. \*\*\*\*,  $p > 0.0001$ ; \*\*\*,  $p > 0.001$ ; \*\*,  $p > 0.01$ ; \*,  $p > 0.05$ ; ns,  $p \geq 0.05$  by one-way ANOVA with Tukey's multiple comparisons test.

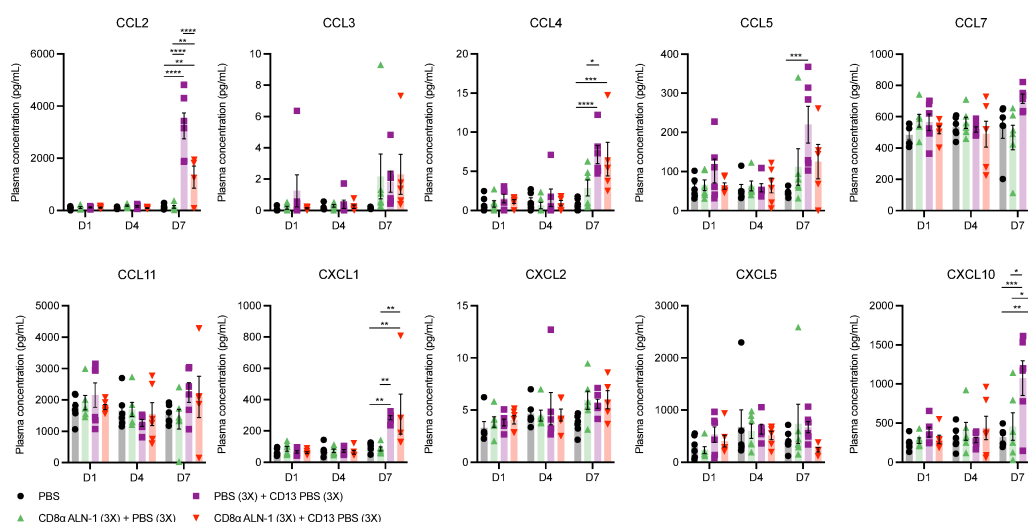

**Supplementary Figure 16.** Plasma chemokine concentrations following different treatments over time. Bars represents the mean ± s.e.m. of an experiment with  $n = 6$  mice/group. \*\*\*\*,  $p > 0.0001$ ; \*\*\*,  $p > 0.001$ ; \*\*,  $p > 0.01$ ; \*,  $p > 0.05$ ; ns,  $p \geq 0.05$  by one-way ANOVA with Tukey's multiple comparisons test.

| Target and fluorochrome                   | Dilution | Clone             | Category number | Supplier                  |
|-------------------------------------------|----------|-------------------|-----------------|---------------------------|
| CD16/32                                   | 100      | clone 93          | 14-0161-82      | Thermo Fisher Scientific  |
| CD19 AF700                                | 500      | clone 145-2C11    | 552774          | BD Biosciences            |
| CD4 FITC                                  | 250      | clone RM4-5       | 100510          | BioLegend                 |
| CD8 APC                                   | 250      | clone 53-6.7      | 553035          | BD Biosciences            |
| CD8 PE                                    | 250      | clone 53-6.7      | 12-0081-82      | Thermo Fisher Scientific  |
| CD45.1 BV605                              | 250      | clone A20         | 110737          | BioLegend                 |
| PD-1 PE                                   | 100      | clone J43         | 12-9985-82      | Thermo Fisher Scientific  |
| LIVE/DEAD Fixable Aqua cell viability dye | 1000     |                   | L34957          | Thermo Fisher Scientific  |
| CD45 BV711                                | 500      | clone 30-F11      | 103147          | BioLegend                 |
| CD3 FITC                                  | 250      | clone 17A2        | 555274          | BD Biosciences            |
| CD4 PE                                    | 250      | clone RM4-5       | 553048          | BD Biosciences            |
| CD4 BV605                                 | 250      | clone RM4-5       | 100547          | BioLegend                 |
| CD44 PerCP-Cy5.5                          | 100      | clone IM7         | 103032          | BioLegend                 |
| CD62L APC-Cy7                             | 100      | clone MEL-14      | 104428          | BioLegend                 |
| T-bet PE-Cy7                              | 100      | clone 4B10        | 644823          | BioLegend                 |
| Eomes PE                                  | 100      | clone Dan11mag    | 12-4875-82      | Thermo Fisher Scientific  |
| MHC-II FITC                               | 250      | clone M5/114.15.2 | 11-5321-82      | Thermo Fisher Scientific  |
| CD11c APC                                 | 250      | clone N418        | 117310          | BioLegend                 |
| XCR1 PE                                   | 100      | clone ZET         | 148204          | BioLegend                 |
| CD11b PE-Cy7                              | 250      | clone M1/70       | 101215          | BioLegend                 |
| CD40 Pacific Blue                         | 100      | clone 3/23        | 124626          | BioLegend                 |
| CD86 APC-Cy7                              | 100      | clone GL-1        | 105030          | BioLegend                 |
| CD45 APC-Cy7                              | 500      | clone 30-F11      | 103116          | BioLegend                 |
| TCR Vb FITC (15 clonotypes)               |          |                   | 557004          | BD Biosciences            |
| CD45 eFluor450                            | 500      | clone 30-F11      | 48-0451-82      | Thermo Fisher Scientific  |
| TCR Vb PE-Cy7                             | 250      | clone KT11        | 125916          | BioLegend                 |
| CD8 PerCP-Cy5.5                           | 250      | clone 53-6.7      | 100733          | BioLegend                 |
| CD44 BV711                                | 100      | clone IM7         | 103057          | BioLegend                 |
| CD62L PE                                  | 100      | clone MEL-14      | 104407          | BioLegend                 |
| CD45.1 APC-Cy7                            | 250      | clone A20         | 560579          | BD Biosciences            |
| CD38 BV711                                | 100      | clone 90/CD38     | 740697          | BD Biosciences            |
| CD101 PE                                  | 100      | clone Moushi101   | 12-1011-82      | Thermo Fisher Scientific  |
| TCF-1 PE-Cy7                              | 100      | clone C63D9       | 90511           | Cell Signaling Technology |
| IFN-g APC                                 | 100      | clone XMG1.2      | 562019          | BD Biosciences            |
| TNF FITC                                  | 100      | clone MP6-XT22    | 506303          | BioLegend                 |

**Supplementary Table 1.** Complete list of antibodies and dyes used in this manuscript.

| TCR clonotype   | OVA alone group | OVA + CD8 $\alpha$ ALN-1 group | Change compared with OVA alone |
|-----------------|-----------------|--------------------------------|--------------------------------|
| V $\beta$ 2     | 4,928333333     | 5,046666667                    | 0,118333333                    |
| V $\beta$ 3     | 2,77            | 2,83                           | 0,06                           |
| V $\beta$ 4     | 3,675           | 3,746666667                    | 0,071666667                    |
| V $\beta$ 5.1/2 | 13,06666667     | 11,93333333                    | -1,133333333                   |
| V $\beta$ 6     | 6,658333333     | 6,406666667                    | -0,251666667                   |
| V $\beta$ 7     | 5,843333333     | 5,828333333                    | -0,015                         |
| V $\beta$ 8.1/2 | 15,61666667     | 15,33333333                    | -0,283333333                   |
| V $\beta$ 8.3   | 6,46            | 6,528333333                    | 0,068333333                    |
| V $\beta$ 9     | 1,883333333     | 2,331666667                    | 0,448333333                    |
| V $\beta$ 10b   | 4,938333333     | 5,143333333                    | 0,205                          |
| V $\beta$ 11    | 5,085           | 6,043333333                    | 0,958333333                    |
| V $\beta$ 12    | 2,541666667     | 2,518333333                    | -0,023333333                   |
| V $\beta$ 13    | 3,648333333     | 3,952                          | 0,303666667                    |
| V $\beta$ 14    | 2,548333333     | 2,853333333                    | 0,305                          |
| V $\beta$ 17b   | 0,82            | 0,505                          | -0,315                         |
| Others          | 19,51666667     | 18,99966667                    | -0,517                         |

**Supplementary Table 2.** Average frequencies and change in average frequencies of CD8<sup>+</sup> TCR V $\beta$  clonotypes. Mice were treated with OVA alone or OVA + CD8 $\alpha$  ALN-1 according to the treatment scheme presented in Fig. 4A ( $n = 6$  mice/group).

## Supplementary Methods

### Recombinant protein design, production and purification

Site-directed mutagenesis was used to introduce the Q148G and Y86F mutation in the coding sequence of human IL-1 $\beta$  and murine TNF, respectively<sup>1,2</sup>. Generation and selection of sdAbs was performed by the VIB Protein Service Facility<sup>1-3</sup>. Proteins were constructed in an in-house developed vector, produced in mammalian FreeStyle<sup>TM</sup> 293-F cells (R79007, Thermo Fisher Scientific) and purified from supernatants as described elsewhere<sup>1</sup>. Purity was evaluated by SDS-PAGE and Instant Blue (EP ISB1L, Expedeon) staining of the protein gel.

### Cell lines and culture conditions

B16- and LLC-OVA cells (Damy Laoui, VIB-VUB) were cultured in DMEM (41966-052, Thermo Fisher Scientific) or RPMI-1640 (61870-044, Thermo Fisher Scientific) + 10% fetal bovine serum (FBS) (10270-106, Thermo Fisher Scientific). All cell lines were grown at 37°C in a humidified atmosphere containing 5% CO<sub>2</sub> and tested negative for mycoplasma (Venor<sup>TM</sup>GeM Mycoplasma Detection Kit, PCR-based, MP0025, Sigma-Aldrich). We did not perform full authentication of the cell lines.

### Mice

Female C57BL/6 mice were purchased from Charles River Laboratories. OT-I TCR transgenic CD45.1 Rag2<sup>-/-</sup> C57BL/6 mice (Bart Lambrecht, VIB-UGent) and full-body Batf3<sup>-/-</sup> C57BL/6 mice (Karine Breckpot, VUB) were bred in our facility. All mice were housed under pathogen-free conditions in IVCs and temperature-controlled environments with a 12h day/12h night cycle and received food and water *ad libitum*. FELASA guidelines were followed in all experiments and approval was obtained by the Ethical Committee of the Faculty of Medicine and Health Sciences (UGent) (ECD 17/80k, ECD 18/127k and ECD 16/07). Mice were

randomly allocated to treatments and investigators were not blinded during data collection and analysis.

### **Formulae**

Tumor volumes (mm<sup>3</sup>) were calculated as: [longest perpendicular side (mm) x shortest perpendicular side (mm) x shortest perpendicular side (mm)]/2. The percentage of SIINFEKL-specific cytolytic activity was calculated as:  $100 - [100 \times (\%CTV^{high} \text{ treated mice} / \%CTV^{low} \text{ treated mice}) / (\%CTV^{high} \text{ PBS-treated mice} / \%CTV^{low} \text{ PBS-treated mice})]$ .

### **TCR sequencing, data processing and analysis (detail)**

Briefly, RNA was reverse transcribed into cDNA with TCR-specific RT primers. Double-stranded cDNA was generated via second-strand synthesis, after which cDNA was end-repaired and A-tailed. Every original cDNA molecule was assigned a unique molecular identifier (UMI) by ligation of a 12-base random adaptor sequence. Target enrichment was performed via PCR with one primer against the constant region and another primer complementary to the adaptor. The library was ultimately amplified via a second PCR, which also introduced platform-specific adaptor sequences and additional sample indices. Samples were then pooled and sequenced in two Illumina MiSeq v2 500 runs. The read data was merged and analyzed using the mouse “Immune Repertoire Analysis” workflow of the CLC Genomics Workbench (GWB) v21 (<https://digitalinsights.qiagen.com/>)<sup>4</sup>. The analysis was done using default parameters, except for “min UMI group size”, which was set to 1. The obtained clonotype results were used to produce count tables and figures.

### **Statistical analyses and data presentation (detail)**

Data sets were compared by unpaired Student’s *t*-testing (two-tailed) for the statistical analysis of differences between two groups or ANOVA (one- or two-way) with Tukey’s or Sidak’s multiple comparisons test for the statistical analysis of differences between more than two

groups. Statistical analysis of differences between Kaplan–Meier survival curve was performed by log-rank testing.

### Supplementary References

1. Van Den Eeckhout, B. *et al.* Specific targeting of IL-1 $\beta$  activity to CD8+ T cells allows for safe use as a vaccine adjuvant. *npj Vaccines* **5**, 1–17 (2020).
2. Huyghe, L. *et al.* Safe eradication of large established tumors using neovasculature-targeted tumor necrosis factor-based therapies. *EMBO Mol. Med.* **12**, 1–15 (2020).
3. Garcin, G., Paul, F., Staufienbiel, M., Bordat, Y. & Van der Heyden, J. High efficiency cell-specific targeting of cytokine activity. *Nat. Commun* **5**, 1–9 (2014).
4. Bolotin, D. A. *et al.* MiXCR: software for comprehensive adaptive immunity profiling. *Nature Methods* vol. 12 380–381 (2015).
