# Supplementary material for: Selective IL-1 activity on CD8+ T cells empowers antitumor immunity and synergizes with neovasculature-targeted TNF for full tumor eradication
Source: PubMed Central journal article supplement (PMC8593706; doi:10.1136/jitc-2021-003293), 2021-11-12
Supplement: jitc-2021-003293supp002.pdf [file jitc-2021-003293supp002.pdf]

## Selective IL-1 activity on CD8<sup>+</sup> T cells empowers antitumor immunity and synergizes with neovasculature-targeted TNF for full tumor eradication

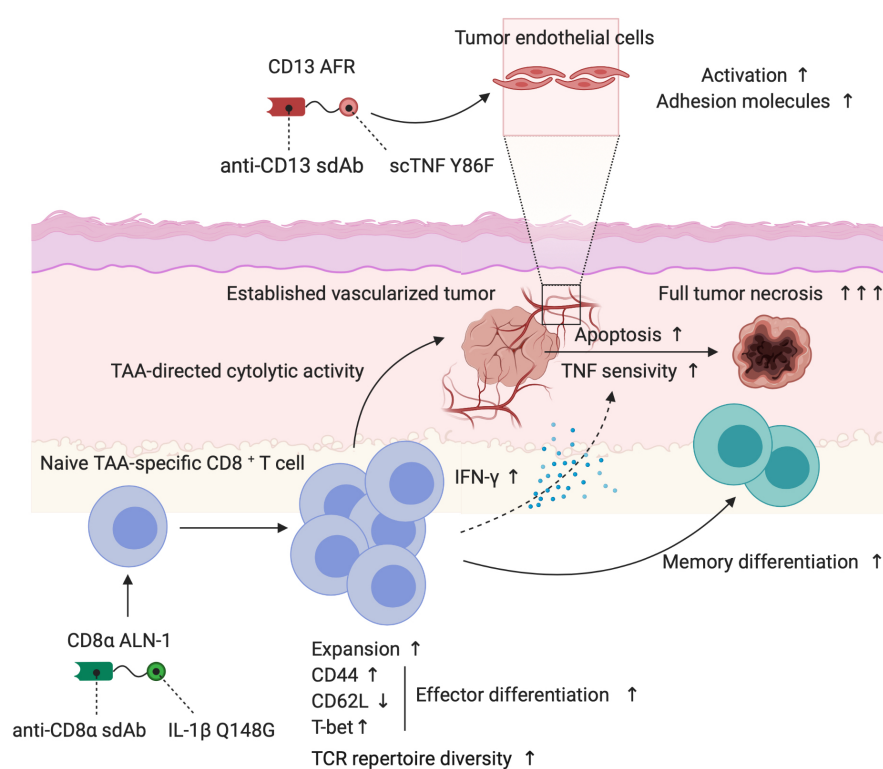

### Authors

Bram Van Den Eeckhout, Leander Huyghe, Sandra Van Lint, Elianne Burg, Stéphane Plaisance, Frank Peelman, Anje Cauwels, Gilles Uzé, Niko Kley, Sarah Gerlo and Jan Tavernier

### Correspondence

sarah.gerlo@ugent.be  
jan.tavernier@vib-ugent.be

### In Brief

AcTakines represent engineered cytokines that deliver cytokine activity to selected cell types only, as such evading damaging toxicities and unwanted off-target side effects. Here, an AcTakine that targets IL-1 $\beta$  activity to CD8<sup>+</sup> T cells safely and efficiently drives antitumor cellular immunity. Combination with a neovasculature-targeted TNF AcTakine induces full tumor necrosis and establishes a protective immunological memory.
